# Supplementary material for: A Proteomics-Based Approach Reveals Differential Regulation of Urine Proteins between Metabolically Healthy and Unhealthy Obese Patients
Source: MDPI journal article supplement (doi:10.3390/ijms20194905), 2019-10-03
Supplement: s1 [file s1]

## Supplementary Materials:

|             | BMI  | GLUC<br>>5.6<br>(mmol/L) | TGL<br>(>1.7mmol/L) | HDL <1.03 mmol/L<br>in males and <1.29<br>mmol/L in females) | BP mm/Hg<br>Systolic >130<br>or Diastolic >85 |   |
|-------------|------|--------------------------|---------------------|--------------------------------------------------------------|-----------------------------------------------|---|
| <b>MUHO</b> |      |                          |                     |                                                              |                                               |   |
| Female      | 34   | Y                        | Y                   | N                                                            | N                                             | N |
| Male        | 39   | N                        | N                   | Y                                                            | Y                                             | N |
| Female      | 56   | Y                        | N                   | Y                                                            | N                                             | N |
| Female      | 59   | Y                        | N                   | Y                                                            | Y                                             | N |
| Male        | 42   | N                        | N                   | Y                                                            | Y                                             | N |
| Male        | 57   | Y                        | Y                   | Y                                                            | N                                             | N |
| Female      | 42   | Y                        | N                   | Y                                                            | Y                                             | N |
| Male        | 52   | Y                        | Y                   | Y                                                            | Y                                             | N |
| Male        | 57   | Y                        | Y                   | Y                                                            | N                                             | N |
| <b>MHO</b>  |      |                          |                     |                                                              |                                               |   |
| Female      | 68.2 | Y                        | N                   | N                                                            | N                                             | N |
| Male        | 71.9 | Y                        | N                   | N                                                            | N                                             | N |
| Female      | 37.6 | Y                        | N                   | N                                                            | N                                             | N |
| Male        | 50.0 | N                        | Y                   | N                                                            | N                                             | N |
| Female      | 37.8 | N                        | Y                   | N                                                            | N                                             | N |
| Female      | 40.2 | N                        | N                   | Y                                                            | N                                             | N |
| Female      | 32.9 | N                        | Y                   | N                                                            | N                                             | N |
| Male        | 40.9 | Y                        | N                   | N                                                            | N                                             | N |
| Male        | 53.4 | N                        | N                   | Y                                                            | N                                             | N |

Y – means Yes, the patient has risk factor

N – means No, the patient does not have risk factor.

**Table S1:** Table showing the grouping of patients into MHO and MUHO according to the IDF criteria.

| Gel | Cy3     | Cy5     | Cy2           |
|-----|---------|---------|---------------|
| 1   | MHO-1   | MUHO-10 | Pooled sample |
| 2   | MUHO-11 | MHO-2   | Pooled sample |
| 3   | MHO-3   | MUHO-12 | Pooled sample |
| 4   | MHO-4   | MUHO-13 | Pooled sample |
| 5   | MUHO-14 | MHO-5   | Pooled sample |
| 6   | MUHO-15 | MHO-6   | Pooled sample |
| 7   | MHO-7   | MUHO-16 | Pooled sample |
| 8   | MHO-8   | MUHO-17 | Pooled sample |
| 9   | MUHO-18 | MHO-9   | Pooled sample |

**Table S2:** Outline for the experimental design.

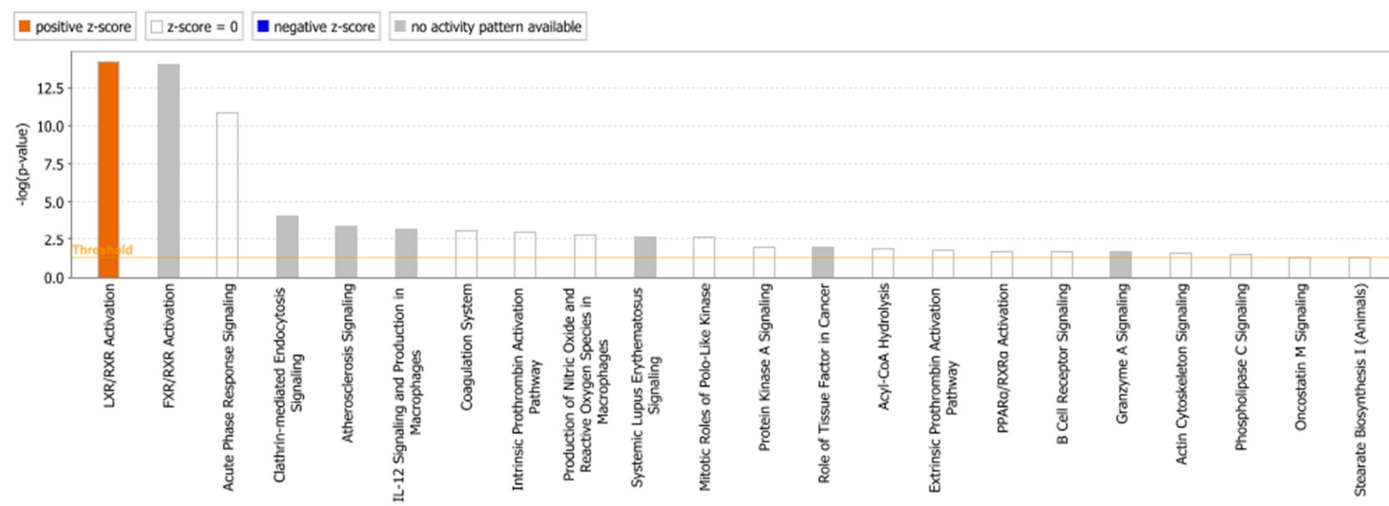

**Figure S1:** The figure shows the different canonical pathways obtained from IPA functional analysis.
